# Supplementary material
Source: Springer Nature journal article supplement (https://www.springermedizin.de/resource/supplementary/13063_2014_2140_MOESM1_ESM.pdf/9621454)

# Consort diagram

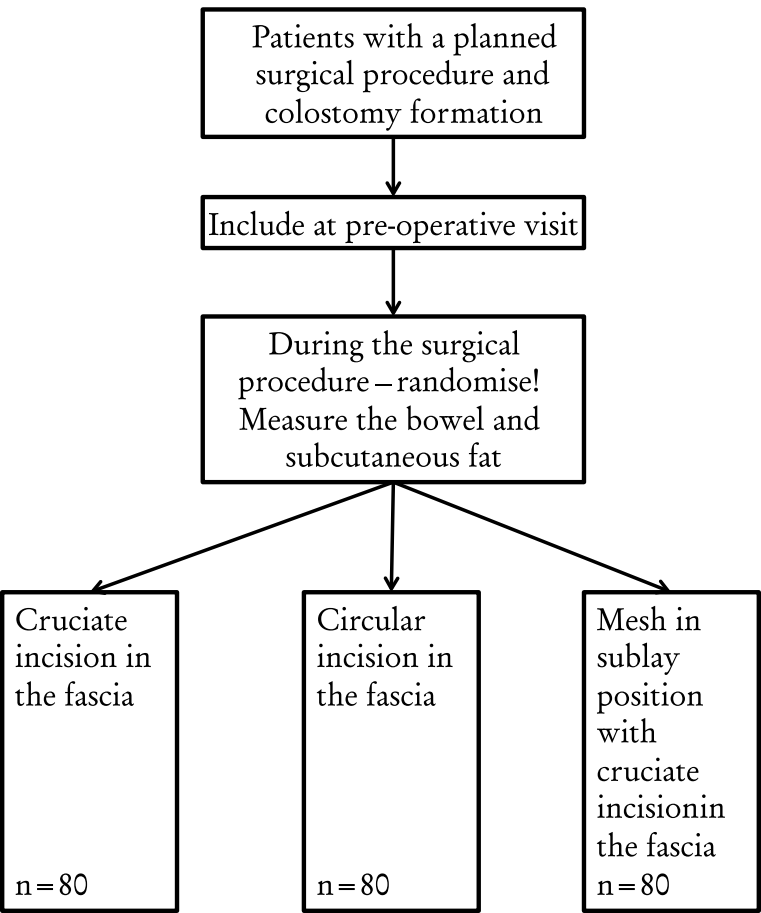

Supplement: MOESM1 [file 9621454]
